# Supplementary material
Source: Springer Nature journal article supplement (https://www.springermedizin.de/resource/supplementary/12874_2010_436_MOESM2_ESM.pdf/9432086)

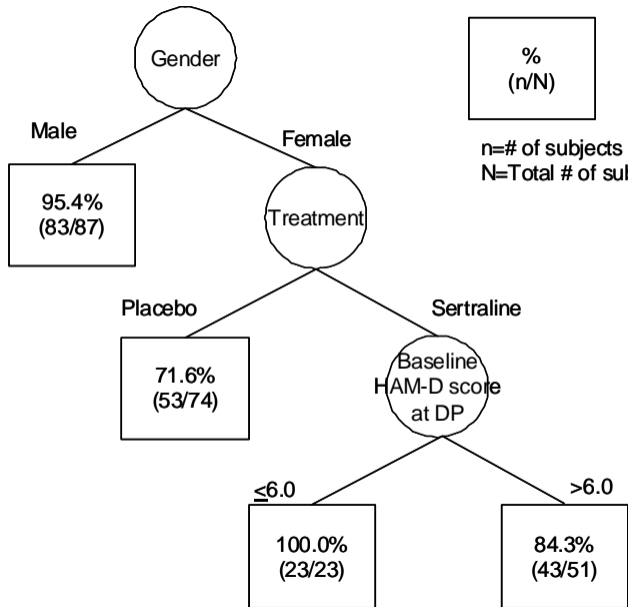

%  
(n/N)

n=# of subjects with non-relapse  
N=Total # of subjects in subgroup

Supplement: MOESM2 [file 9432086]
